# Supplementary material for: Development and validation of a multi-parameter nomogram for predicting prostate cancer: a retrospective analysis from Handan Central Hospital in China
Source: PeerJ. 2022 Mar 2;10:e12912. doi: 10.7717/peerj.12912 (PMC8898009; doi:10.7717/peerj.12912)
Supplement: Supplemental Information 1 [file peerj-10-12912-s001.xlsx]

## Sheet: Sheet1
Age	tPSA	fPSA	PV	label	DRE	TRUS	BMI	FT	PSAD	hp	dia
77	0.2	0.1	15.8413	1	1	0	1	0.5	0.0126252	1	0
79	3.8	0.6	60.2784	0	0	1	1	0.157895	0.0630408	0	0
42	1.9	0.3	45.7517	0	0	1	0	0.157895	0.0415285	0	0
72	1.9	0.3	28.5542	0	0	1	1	0.157895	0.06654	0	0
67	1.9	0.3	40.8439	0	1	0	1	0.157895	0.0465186	1	0
72	3.2	0.5	38.6942	0	1	0	2	0.15625	0.0826996	1	1
72	3.9	0.6	48.9294	0	1	0	0	0.153846	0.0797067	1	1
72	1.96	0.3	42.405	0	0	1	1	0.153061	0.046221	1	1
66	3.4	0.5	36.6912	0	1	0	1	0.147059	0.0926653	1	0
58	1.4	0.2	24.57	0	0	1	0	0.142857	0.0569801	1	0
77	1.4	0.2	20.592	0	1	0	1	0.142857	0.0679876	1	1
82	2.1	0.3	37.3464	0	0	1	0	0.142857	0.0562303	0	0
65	3.7	0.5	56.2719	0	1	0	0	0.135135	0.0657522	0	0
74	3	0.4	49.192	0	0	1	2	0.133333	0.0609855	1	1
64	3	0.4	49.2492	0	1	0	0	0.133333	0.0609147	1	0
63	3.9	0.5	35.9268	0	0	1	0	0.128205	0.108554	0	0
64	3.2	0.4	18.8604	0	1	0	2	0.125	0.169668	0	0
68	2.4	0.3	37.0656	0	0	1	1	0.125	0.0647501	1	0
66	1.6	0.2	30.6634	0	1	0	0	0.125	0.0521795	1	1
71	3.3	0.4	54.8402	0	0	1	1	0.121212	0.0601748	0	0
55	2.5	0.3	20.5265	0	0	1	0	0.12	0.121794	0	1
71	1.7	0.2	45.995	0	1	0	1	0.117647	0.0369605	1	0
76	3.5	0.4	82.4678	0	0	1	1	0.114286	0.0424408	1	0
63	3.6	0.4	78.2153	0	1	0	2	0.111111	0.0460268	1	0
64	0.9	0.1	29.6296	0	1	0	2	0.111111	0.030375	1	0
80	2.8	0.3	21.1068	0	1	0	1	0.107143	0.132659	1	0
76	2.8	0.3	29.484	0	0	1	0	0.107143	0.0949668	0	0
70	3.8	0.4	41.8579	0	0	1	0	0.105263	0.0907833	1	0
75	1	0.1	35.7178	0	0	1	1	0.1	0.0279973	1	0
79	1	0.1	25.272	0	1	0	0	0.1	0.0395695	1	0
75	3	0.3	36.0422	0	0	1	1	0.1	0.0832357	1	0
75	2.1	0.2	42.6629	0	1	0	2	0.0952381	0.0492231	1	0
55	2.2	0.2	29.4372	0	1	0	1	0.0909091	0.0747354	0	0
77	1.2	0.1	29.2032	0	1	0	1	0.0833333	0.0410914	1	1
71	3.6	0.3	43.4928	0	0	1	0	0.0833333	0.0827723	0	0
72	2.5	0.2	30.3212	0	0	1	2	0.08	0.0824506	1	0
50	1.3	0.1	33.6057	0	0	1	2	0.0769231	0.0386839	0	0
59	2.8	0.2	70.9209	0	0	1	2	0.0714286	0.0394806	0	0
67	2.8	0.2	36.3584	0	0	1	0	0.0714286	0.0770111	1	0
60	1.4	0.1	38.6942	0	1	0	2	0.0714286	0.0361811	1	0
57	1.6	0.1	27.456	0	1	0	0	0.0625	0.0582751	1	0
70	2.1	0.1	74.66	0	0	1	1	0.047619	0.0281275	0	0
71	2.1	0.1	42.4055	0	1	0	1	0.047619	0.0495219	1	0
71	2.6	0.1	34.6788	0	1	0	0	0.0384615	0.0749738	0	0
66	3.5	1.5	19.423	0	0	1	1	0.428571	0.180198	1	0
69	8.8	2.7	27.1898	1	0	0	2	0.306818	0.323651	1	0
74	8.1	1.4	32.5052	1	0	1	1	0.17284	0.249191	1	0
56	8.1	0.4	43.68	1	0	0	0	0.0493827	0.18544	0	0
78	8	1.4	60.632	1	0	0	2	0.175	0.131944	0	0
77	7.9	2.8	49.5643	1	0	1	0	0.35443	0.159389	1	0
74	6.8	2	84.6518	1	0	0	2	0.294118	0.080329	0	0
63	6.8	1.2	14.9094	1	0	1	1	0.176471	0.456087	0	0
57	6.5	1	59.904	1	0	1	1	0.153846	0.108507	0	0
56	5.6	0.71	21.216	1	0	1	0	0.126786	0.263952	0	0
60	4.6	1.3	56.8339	1	0	1	2	0.282609	0.0809376	0	0
85	4.2	0.7	38.3383	1	0	0	0	0.166667	0.109551	1	0
75	6.5	0.8	144.144	0	0	0	1	0.123077	0.0450938	1	0
66	8.5	1.1	115.839	0	0	0	0	0.129412	0.0733775	0	0
62	5.6	0.7	114.92	0	0	0	0	0.125	0.0487296	0	0
73	9.2	1.4	110.323	0	0	0	1	0.152174	0.0833913	1	0
69	6.6	1	98.6419	0	0	0	1	0.151515	0.0669087	1	0
67	8.9	1.1	155.113	0	0	0	0	0.123596	0.0573776	0	0
74	9.5	1.5	87.8062	0	0	0	0	0.157895	0.108193	0	0
81	5.9	0.8	84.3648	0	0	0	2	0.135593	0.0699344	0	0
70	4.6	0.7	77.6204	0	0	0	1	0.152174	0.0592628	1	0
64	6.2	0.9	74.9112	0	0	0	0	0.145161	0.0827647	0	0
83	5.9	0.9	70.304	0	0	0	0	0.152542	0.0839213	0	0
80	5.1	0.6	68.5542	0	0	0	1	0.117647	0.0743937	1	0
65	8	1.2	64.5216	0	0	0	1	0.15	0.123989	1	0
73	8.2	1.3	59.3965	0	0	0	0	0.158537	0.138055	0	1
65	9.1	1.8	57.7054	0	0	0	1	0.197802	0.157698	0	0
69	8.2	1.3	54.5688	0	0	0	2	0.158537	0.150269	0	0
74	9.2	1.7	52.546	0	0	0	0	0.184783	0.175085	1	0
68	4.5	0.5	51.0796	0	0	0	1	0.111111	0.0880978	0	0
79	9.2	0.7	49.2222	0	0	0	2	0.076087	0.186908	1	0
70	4.5	0.6	48.8342	0	0	0	0	0.133333	0.0921485	0	1
84	7.3	1.1	47.8951	0	0	0	1	0.150685	0.152416	1	0
78	9.9	2.6	47.1744	0	1	0	1	0.262626	0.20986	1	0
74	8.9	1	46.6752	0	0	0	2	0.11236	0.190679	0	0
78	5.2	0.8	46.6752	0	0	0	0	0.153846	0.111408	1	0
73	5.1	0.5	46.3736	0	0	0	2	0.0980392	0.109976	0	0
83	9.6	1	46.0606	0	0	1	0	0.104167	0.208421	0	0
70	6.9	0.9	45.6456	0	0	0	0	0.130435	0.151165	1	0
70	7.8	1.2	42.797	0	0	0	0	0.153846	0.182256	0	0
84	5.6	0.5	42.0202	0	0	0	1	0.0892857	0.133269	1	0
77	6.7	1.7	41.9146	0	0	0	0	0.253731	0.159849	1	1
79	9.6	0.8	40.9032	0	0	0	0	0.0833333	0.2347	1	0
69	7.2	0.9	39.312	0	0	0	1	0.125	0.18315	1	0
73	6.5	1	38.3011	0	0	0	0	0.153846	0.169708	1	0
65	7.2	1.3	34.9003	0	0	0	0	0.180556	0.206302	0	0
77	6.5	1.8	32.3482	0	0	1	0	0.276923	0.200939	1	0
70	8.6	1.2	31.7179	0	0	0	0	0.139535	0.27114	1	0
66	8.7	1	31.5058	0	0	0	0	0.114943	0.27614	0	0
69	8	0.4	29.8771	0	0	0	1	0.05	0.267763	0	1
65	10	1.1	29.12	0	0	0	1	0.11	0.343407	1	0
81	4.5	1.4	28.1549	0	0	0	0	0.311111	0.15983	0	0
69	8	1.8	27.9552	0	0	0	1	0.225	0.286172	1	0
77	6.7	1.2	25.7587	0	0	0	0	0.179104	0.260106	0	0
65	5.5	1.1	23.5674	0	0	0	0	0.2	0.233373	0	1
80	7	3.69	21.5654	0	0	0	2	0.527143	0.324593	0	0
69	4.8	0.7	20.7792	0	0	0	0	0.145833	0.231	0	0
78	8.8	1.9	20.4672	0	0	0	1	0.215909	0.429956	0	0
68	19.7	2.9	64.7338	0	0	0	1	0.147208	0.304323	1	0
69	19.2	2.5	97.317	0	0	0	0	0.130208	0.197293	1	0
69	18.7	2.6	56.8818	0	0	0	0	0.139037	0.328752	1	0
66	18.5	2.9	75.1374	0	0	1	1	0.156757	0.246216	1	0
66	18.4	2.4	64.0224	0	0	0	0	0.130435	0.287399	1	0
70	18.2	2.7	51.3677	0	1	0	2	0.148352	0.354308	1	1
75	16.8	1.8	40.6926	0	0	0	1	0.107143	0.412851	1	0
76	16.8	1.5	49.3932	0	0	0	0	0.0892857	0.340128	0	1
56	16.4	2.4	69.2172	0	0	0	0	0.146341	0.236935	0	0
73	16.3	1.6	70.0877	0	0	0	1	0.0981595	0.232566	1	0
74	15.6	2.1	39.8029	0	0	1	1	0.134615	0.391931	1	0
60	15.5	2	67.392	0	0	0	1	0.129032	0.229998	1	1
73	15.4	2.1	45.3492	0	0	0	0	0.136364	0.339587	0	1
75	15.1	1.9	86.5426	0	0	0	1	0.125828	0.174481	0	1
60	14.9	1.1	93.04	0	0	0	1	0.0738255	0.160146	0	0
76	14.9	2.2	79.4976	0	0	0	0	0.147651	0.187427	1	1
70	14.4	1.7	75.816	0	0	1	0	0.118056	0.189934	1	0
65	14.4	2.1	55.0264	0	0	0	1	0.145833	0.261693	1	0
74	14.17	2.26	45.137	0	0	0	0	0.159492	0.313933	0	0
65	13.8	1.3	39.8029	0	0	1	1	0.0942029	0.346709	1	0
60	13.7	1.8	24.8648	0	0	0	2	0.131387	0.550979	0	0
66	13.6	1.6	33.359	0	0	0	1	0.117647	0.407686	0	0
67	13.3	1.6	45.6456	0	0	0	2	0.120301	0.291375	0	0
75	13	1.8	35.568	0	0	0	0	0.138462	0.365497	0	0
65	12.5	1.9	55.1616	0	0	0	1	0.152	0.226607	0	0
75	12.3	1.7	46.2384	0	0	0	0	0.138211	0.266013	0	0
73	12.3	1.4	35.178	0	0	0	1	0.113821	0.34965	1	0
70	12	1.3	57.5853	0	0	0	1	0.108333	0.208386	0	0
70	11.9	1.6	44.175	0	0	1	1	0.134454	0.269383	0	0
64	11.6	1.4	26.754	0	1	1	1	0.12069	0.43358	0	0
63	11.3	1.2	31.2998	0	0	0	0	0.106195	0.361024	0	0
61	11.1	1.6	57.7354	0	0	0	1	0.144144	0.192256	0	1
67	10.7	1.6	57.2645	0	1	0	1	0.149533	0.186852	0	0
73	10.6	0.7	55.5984	0	0	0	1	0.0660377	0.190653	0	0
62	10.4	1.1	22.464	0	0	0	0	0.105769	0.462963	0	0
72	10.1	1.4	62.0963	0	0	0	0	0.138614	0.162651	0	0
65	19.8	2.8	50.1228	1	0	1	2	0.141414	0.39503	0	0
62	19.1	4	33.1157	1	1	1	0	0.209424	0.576766	0	0
70	17.9	2.2	19.656	1	1	1	1	0.122905	0.910663	1	0
65	15.4	2.6	19.968	1	0	0	0	0.168831	0.771234	0	0
89	14.5	7	44.4808	1	1	0	2	0.482759	0.325983	1	1
62	14.4	3.5	46.6643	1	1	0	2	0.243056	0.308587	0	0
69	13.7	6.2	39.822	1	0	1	0	0.452555	0.344031	1	0
65	13.6	1.6	33.1968	1	0	0	2	0.117647	0.409678	0	0
75	13	1.7	12.4114	1	0	1	2	0.130769	1.04743	1	1
78	12.9	1.1	25.4592	1	0	1	0	0.0852713	0.506693	0	0
73	12.5	2.3	63.3235	1	0	0	0	0.184	0.197399	0	0
80	50	7.1	32.3996	1	0	1	1	0.142	1.54323	1	0
86	49.6	7.6	36.9907	1	0	1	1	0.153226	1.34088	0	0
84	48.6	10.3	27.0317	1	0	1	0	0.211934	1.79789	1	0
49	47.4	15.6	52.5658	1	1	0	1	0.329114	0.901728	1	0
82	46.5	7.5	49.7182	1	1	0	2	0.16129	0.93527	0	0
80	46.1	10.7	57.33	1	0	0	0	0.232104	0.804117	1	0
63	45.4	3.2	69.9473	1	0	0	1	0.0704846	0.64906	0	0
69	41.6	3.6	37.0406	1	1	1	2	0.0865385	1.12309	1	0
73	40.5	7.7	45.0918	1	1	1	0	0.190123	0.898168	0	0
63	38.8	8.8	23.0724	1	1	1	2	0.226804	1.68166	0	0
73	36.3	4.5	47.6986	1	0	0	1	0.123967	0.761029	1	0
90	35	5.4	39.1373	1	0	1	0	0.154286	0.894288	0	0
81	32.5	20.4	117.262	1	0	1	1	0.627692	0.277157	1	0
76	32	7.5	43.7486	1	1	0	1	0.234375	0.731451	0	1
71	29.2	3.7	37.1732	1	0	0	1	0.126712	0.785511	1	0
63	26.2	2.7	29.7835	1	1	0	2	0.103053	0.879681	0	0
73	23.3	1.7	21.84	1	0	0	0	0.0729614	1.06685	0	1
69	21.6	2.5	28.665	1	0	1	2	0.115741	0.753532	1	0
68	20.8	2.7	77.0515	1	0	0	1	0.129808	0.269949	1	0
72	20.1	5.3	37.44	1	1	0	1	0.263682	0.536859	1	0
63	46.1	2.5	70.7616	0	0	0	1	0.0542299	0.651483	1	0
73	43.3	2.9	30.3212	0	0	1	0	0.0669746	1.42804	0	0
69	43	2.9	39.0796	0	0	0	1	0.0674419	1.10032	1	1
81	41.5	4.3	67.885	0	0	0	0	0.103614	0.611328	0	0
63	39.3	2.1	36.0422	0	0	0	0	0.0534351	1.09039	0	0
72	39.2	3.9	118.558	0	0	0	0	0.0994898	0.330639	1	1
77	36.5	4.2	100.043	0	0	0	0	0.115068	0.364844	0	0
80	36.4	5.3	83.0934	0	0	0	2	0.145604	0.438061	1	0
65	35.1	3.6	155.56	0	0	1	0	0.102564	0.225637	1	0
73	35.1	3.6	36.894	0	0	0	0	0.102564	0.951374	0	0
69	35	4.8	111.351	0	0	0	1	0.137143	0.314322	1	1
70	34.4	4.3	30.4762	0	0	0	1	0.125	1.12875	0	0
77	30.5	3.9	65.8944	0	0	0	0	0.127869	0.462862	0	0
83	30.1	3.8	69.5354	0	0	0	2	0.126246	0.432873	1	0
77	29.2	4.4	91.7316	0	0	0	1	0.150685	0.31832	1	0
74	28.6	3.7	62.5997	0	0	0	2	0.129371	0.456871	1	0
74	27.5	3.43	71.1797	0	0	0	0	0.124727	0.386346	1	1
72	27.1	4.2	44.226	0	0	0	1	0.154982	0.612762	1	0
76	26.5	2.7	43.8048	0	0	0	0	0.101887	0.604957	0	0
69	25.7	2.6	25.6714	0	0	0	0	0.101167	1.00112	1	0
63	25.7	4	38.1264	0	0	1	0	0.155642	0.674074	1	0
72	25.6	2.6	114.92	0	0	0	1	0.101562	0.222764	0	0
58	24.6	2.5	36.4	0	0	0	1	0.101626	0.675824	0	0
81	23.6	2.8	70.7616	0	0	0	0	0.118644	0.333514	0	0
78	23.1	3.6	37.44	0	0	0	0	0.155844	0.616987	1	0
66	23	2.7	69.224	0	0	0	0	0.117391	0.332255	0	1
78	22.9	2.2	50.4442	0	0	0	0	0.0960699	0.453967	1	0
60	22.8	2.5	31.85	0	0	0	2	0.109649	0.715856	1	0
73	21	1.9	37.6085	0	0	0	0	0.0904762	0.558385	1	0
82	20.9	3.1	128.186	0	0	0	1	0.148325	0.163044	0	0
69	20.9	3.2	86.3179	0	0	0	2	0.15311	0.242128	0	0
72	20.7	1.6	95.004	0	0	0	1	0.0772947	0.217886	1	0
73	20.5	1.2	30.551	0	0	0	0	0.0585366	0.671008	0	0
73	20.4	2.8	43.472	0	0	1	1	0.137255	0.469268	0	1
64	20.3	2.5	72.93	0	0	0	2	0.123153	0.278349	1	0
74	20.1	3.2	84.6518	0	0	0	0	0.159204	0.237443	0	0
49	48.3	13.2	127.964	0	0	0	0	0.273292	0.377449	0	0
67	43.2	8.5	59.1136	0	0	0	0	0.196759	0.730796	0	0
66	42.5	12.1	114.244	0	0	0	0	0.284706	0.372011	1	0
77	39.7	15.6	94.2552	0	0	0	0	0.392947	0.421197	1	1
67	38.2	9.1	44.3352	0	1	1	1	0.23822	0.861618	1	1
74	36.1	7.3	95.823	0	0	0	1	0.202216	0.376736	0	0
81	32.1	5.5	144.693	0	0	0	0	0.17134	0.221849	1	0
72	30.7	9.4	100.639	0	1	1	1	0.306189	0.305052	0	0
81	30.6	7.6	121.424	0	0	0	0	0.248366	0.252009	1	0
76	25.8	6.4	105.564	0	0	1	0	0.248062	0.244401	0	1
76	25.1	6	40.9859	0	0	0	2	0.239044	0.612406	1	0
73	24.6	7.5	150.883	0	0	1	1	0.304878	0.16304	1	0
63	24.5	4.6	104.486	0	0	0	1	0.187755	0.234482	1	0
67	24.2	5	48.2227	0	0	0	1	0.206612	0.501838	1	1
81	23.6	3.8	73.892	0	0	0	0	0.161017	0.319385	1	1
78	23.5	3.9	70.1719	0	0	0	0	0.165957	0.334892	0	0
82	23.4	6.3	142.846	0	0	0	1	0.269231	0.163813	0	0
68	22	4	72.5587	0	0	0	1	0.181818	0.303203	0	1
66	21.7	3.9	61.6106	0	0	0	0	0.179724	0.352212	0	0
80	21.6	4.5	113.703	0	0	0	2	0.208333	0.189968	0	0
80	20.7	4.5	48.1572	0	0	1	1	0.217391	0.429842	1	1
65	20.4	3.6	64.2013	0	0	0	1	0.176471	0.317751	1	1
75	97.4	17.1	53.9448	1	0	0	0	0.175565	1.80555	0	0
76	92.1	3.6	40.5132	1	0	0	1	0.0390879	2.27333	1	1
65	80.6	8.9	45.9659	1	1	1	1	0.110422	1.75347	0	0
87	79.7	10.3	39.1076	1	0	1	2	0.129235	2.03796	1	0
82	77.9	7.4	53.7758	1	0	1	0	0.0949936	1.44861	1	0
71	76.8	13.7	65.78	1	1	1	0	0.178385	1.16753	0	1
76	74.5	2.5	55.004	1	0	0	2	0.033557	1.35445	1	0
78	72.2	6.7	19.1318	1	1	1	0	0.0927978	3.77381	0	0
56	70.6	5.6	54.4034	1	1	0	2	0.0793201	1.29771	1	1
68	70.3	7.9	32.7465	1	1	0	0	0.112376	2.1468	0	1
82	67.1	6	50.1509	1	0	1	0	0.0894188	1.33796	1	0
75	65.9	7.6	63.4358	1	1	0	1	0.115326	1.03884	0	0
73	65.4	12.3	65.5462	1	0	0	1	0.188073	0.997769	1	0
56	65.2	14.3	43.1558	1	0	1	1	0.219325	1.5108	1	0
64	64	17.8	143.988	1	1	1	0	0.278125	0.444481	0	0
68	62.1	8.8	54.7747	1	0	0	1	0.141707	1.13373	0	0
74	61.3	5.2	26.2434	1	1	0	1	0.0848287	2.33583	1	1
68	60.2	7.4	45.279	1	0	0	1	0.122924	1.32953	1	0
71	59.4	6.1	32.1048	1	0	0	0	0.102694	1.85019	0	0
77	57.8	5.6	59.305	1	0	1	1	0.0968858	0.974623	1	0
83	55.4	5.8	27.5184	1	0	1	0	0.104693	2.0132	0	0
68	54.4	4.5	45.3362	1	1	1	0	0.0827206	1.19992	1	0
67	53	13.6	41.3338	1	0	0	2	0.256604	1.28224	0	1
64	52.72	7.24	41.6	1	1	1	1	0.137329	1.26731	0	0
78	50.8	21	30.6571	1	0	0	0	0.413386	1.65704	1	0
80	50	7.1	32.3996	1	0	0	1	0.142	1.54323	1	0
71	65.5	13.9	107.671	0	0	1	1	0.212214	0.608334	1	0
72	72.1	10.1	97.1101	0	0	0	2	0.140083	0.742456	1	0
72	70.3	4.5	78.0125	0	0	0	1	0.0640114	0.901138	1	0
66	51.7	3.9	71.7101	0	0	0	1	0.0754352	0.720959	0	0
60	81.3	20.9	68.796	0	0	0	0	0.257073	1.18175	0	0
76	63.1	10.8	62.5997	0	1	0	0	0.171157	1.00799	1	0
66	52.1	5	61.9164	0	0	0	1	0.0959693	0.841457	1	1
79	53.3	12.1	52.831	0	0	0	2	0.227017	1.00888	1	0
74	1.7	3.2	26.117	1	0	1	1	1.88235	0.0650917	1	0
72	0.6	0.1	25.1597	1	0	1	2	0.166667	0.0238477	1	0
47	0.2	0.1	36.167	1	1	0	1	0.5	0.0055299	1	0
74	0.2	0.1	19.968	1	1	1	1	0.5	0.010016	0	0
66	2	0.3	50.6844	0	0	1	0	0.15	0.0394599	1	0
68	2.7	0.4	69.3607	0	0	1	0	0.148148	0.0389269	0	0
66	3.61	0.52	30.4096	0	0	1	1	0.144044	0.118713	1	1
69	2.1	0.3	25.7421	0	0	1	0	0.142857	0.0815785	1	0
70	3.6	0.5	40.1138	0	1	0	1	0.138889	0.0897446	0	1
58	3	0.4	46.2405	0	0	1	2	0.133333	0.0648782	0	0
76	2.3	0.3	51.8076	0	0	1	0	0.130435	0.044395	1	0
69	1.6	0.2	25.6256	0	0	1	1	0.125	0.0624376	1	0
70	3.3	0.4	40.0733	0	0	1	1	0.121212	0.0823491	0	0
60	3.5	0.4	84.9139	0	1	0	2	0.114286	0.0412182	0	0
67	2.7	0.3	18.3128	0	0	1	1	0.111111	0.147438	1	0
81	1.92	0.21	26.3598	0	0	1	2	0.109375	0.0728381	0	0
68	1.9	0.2	51.6516	0	0	1	1	0.105263	0.0367849	0	0
61	2	0.2	55.432	0	0	1	1	0.1	0.0360802	1	1
60	2	0.2	28.3712	0	0	1	1	0.1	0.070494	1	1
72	2	0.2	26.8382	0	1	0	0	0.1	0.0745205	1	0
66	3.95	0.39	32.2483	0	0	1	1	0.0987342	0.122487	1	0
65	2.1	0.2	39.3006	0	0	1	2	0.0952381	0.0534344	0	1
53	2.17	0.19	24.5024	0	0	1	0	0.0875576	0.0885628	1	0
68	3.6	0.3	42.0992	0	0	1	0	0.0833333	0.0855123	0	0
77	3.9	0.3	42.9936	0	0	1	2	0.0769231	0.0907112	1	1
71	2.7	0.2	31.537	0	1	0	1	0.0740741	0.0856138	0	0
65	1.4	0.1	44.3586	0	0	0	1	0.0714286	0.031561	0	0
71	3.6	0.2	19.319	0	0	1	0	0.0555556	0.186345	0	0
83	1.46	0.01	31.8232	0	1	0	0	0.00684932	0.0458785	0	0
54	6.9	0.6	41.2542	1	1	0	2	0.0869565	0.167256	1	0
71	6.8	1	20.9664	1	1	1	1	0.147059	0.324328	0	0
65	6.6	3.4	65.7306	1	0	1	2	0.515152	0.10041	1	1
76	4.7	0.3	21.6216	1	0	1	2	0.0638298	0.217375	0	0
56	9.4	1.1	134.054	0	0	0	1	0.117021	0.070121	0	0
68	7.2	0.5	122.512	0	0	0	1	0.0694444	0.0587698	1	0
71	4.1	0.5	113.811	0	0	0	0	0.121951	0.0360245	0	1
67	7.2	0.9	92.951	0	0	0	1	0.125	0.0774601	1	0
84	7.8	1.1	86.8795	0	0	0	0	0.141026	0.0897795	0	0
78	4.1	0.6	84.6518	0	0	0	0	0.146341	0.0484337	0	0
72	4.7	0.617	69.7133	0	0	0	2	0.131277	0.067419	1	0
62	5.9	0.8	60.8026	0	0	0	0	0.135593	0.0970354	0	0
73	8.9	1	60.372	0	0	0	2	0.11236	0.147419	0	0
81	9.9	2.34	58.7059	0	0	0	0	0.236364	0.168637	1	0
81	7.2	0.9	150.511	0	0	0	0	0.125	0.0478369	0	0
73	6.9	1	51.1597	0	1	0	1	0.144928	0.134872	1	0
63	8.2	2.9	49.7952	0	0	0	0	0.353659	0.164675	0	0
79	4.1	0.6	49.505	0	0	0	0	0.146341	0.0828199	1	1
69	7.7	1.925	48.3678	0	1	0	0	0.25	0.159197	0	0
67	9.5	1.1	47.2025	0	0	0	0	0.115789	0.201261	0	0
55	7.4	0.8	46.5825	0	0	0	0	0.108108	0.158858	1	0
73	5	0.6	45.6456	0	0	0	1	0.12	0.10954	0	0
67	5.2	0.2	41.8912	0	0	0	1	0.0384615	0.124131	0	0
80	6.7	1.2	40.9032	0	0	0	1	0.179104	0.163801	1	1
71	6.6	0.9	40.56	0	0	0	0	0.136364	0.162722	0	0
67	4.2	0.5	170.57	0	1	1	1	0.119048	0.0246233	1	0
76	7.6	1.6	39.8268	0	0	0	0	0.210526	0.190826	0	0
67	6.3	1	39.7114	0	0	0	2	0.15873	0.158645	1	0
69	4.7	0.6	37.0999	0	0	0	2	0.12766	0.126685	1	0
70	6.9	2.17	36.2201	0	0	0	0	0.314493	0.190502	1	1
78	4.5	0.7	35.5914	0	0	0	0	0.155556	0.126435	0	0
81	7.86	0.31	35.0714	0	1	0	1	0.0394402	0.224114	1	0
77	6.8	2	31.6498	0	0	0	1	0.294118	0.214851	0	0
83	5.1	1.3	27.7992	0	0	0	0	0.254902	0.183459	0	0
73	19.6	2.7	75.4	0	0	0	0	0.137755	0.259947	1	0
68	19.4	1.9	36.7411	0	0	0	1	0.0979381	0.528019	0	0
63	18.4	2.4	26.1544	0	0	0	1	0.130435	0.703513	0	1
62	18.3	1.3	114.92	0	0	0	2	0.0710383	0.159241	0	0
64	18.2	2.6	52.8814	0	0	0	2	0.142857	0.344166	1	0
65	17.2	1.5	27.5184	0	0	0	0	0.0872093	0.625036	1	0
83	17.1	2.6	74.0813	0	0	0	2	0.152047	0.230828	1	0
81	16.6	2.3	18.252	0	0	1	2	0.138554	0.909489	1	0
75	15.8	1.6	65.6365	0	0	0	0	0.101266	0.24072	1	0
68	15.4	2.2	78.7925	0	0	0	0	0.142857	0.19545	0	0
65	14.8	1.5	29.302	0	0	0	0	0.101351	0.505085	0	0
80	12.6	1.4	48.2144	0	0	0	0	0.111111	0.261333	0	0
68	12.1	1.4	52.4628	0	0	0	1	0.115702	0.23064	1	0
59	11.9	1.8	61.776	0	0	0	0	0.151261	0.192631	1	0
70	11.8	1.8	40.248	0	0	0	0	0.152542	0.293182	1	0
79	11.2	1.5	42.64	0	0	0	1	0.133929	0.262664	0	0
61	10.5	1.1	46.7251	0	0	0	0	0.104762	0.224719	1	0
74	10.5	1.6	54.4034	0	0	0	0	0.152381	0.193003	1	0
79	10	1.3	49.3709	0	0	0	0	0.13	0.202549	1	0
68	19.6	6.2	99.9804	1	1	1	0	0.316327	0.196038	0	0
69	17.9	2.2	19.656	1	1	1	1	0.122905	0.910663	1	0
79	13.3	1.5	46.0221	1	0	0	1	0.112782	0.288992	0	1
76	11.9	0.8	49.9663	1	0	1	1	0.0672269	0.238161	1	0
84	11.9	2.4	24.779	1	0	0	0	0.201681	0.480245	0	0
65	10.16	1.21	18.0695	1	0	1	1	0.119094	0.562274	1	1
82	48.8	5	62.9878	1	0	0	1	0.102459	0.774754	1	0
69	48	7.6	40.3104	1	0	1	2	0.158333	1.19076	1	0
81	43.18	9.67	78.8216	1	1	0	1	0.223946	0.547819	0	0
89	41.4	14.3	41.86	1	0	0	0	0.345411	0.989011	1	0
73	40.5	1.7	31.616	1	1	1	0	0.0419753	1.281	0	0
79	38	4	41.6707	1	0	1	0	0.105263	0.911911	0	0
77	37.5	2.6	46.1261	1	0	1	1	0.0693333	0.812989	1	0
75	37	4.9	42.9811	1	0	0	2	0.132432	0.860843	1	0
76	35.8	4.4	29.12	1	1	1	2	0.122905	1.2294	1	1
63	26.2	2.7	29.7835	1	0	0	2	0.103053	0.879681	0	0
79	20.4	14.8	75.712	1	0	1	0	0.72549	0.269442	0	0
77	20.1	7.6	25.3968	1	0	0	1	0.378109	0.791438	0	0
67	48.8	5	34.3434	0	1	0	1	0.102459	1.42094	1	0
76	45.6	3.7	62.4312	0	0	0	0	0.0811404	0.730404	0	0
69	39.2	3.7	138.88	0	0	0	0	0.0943878	0.282257	1	0
68	38.4	5	98.67	0	0	0	0	0.130208	0.389176	1	1
72	36.7	4.7	39.1076	0	0	0	1	0.128065	0.938436	1	1
76	31.5	3	36.6912	0	0	0	2	0.0952381	0.858516	1	0
69	31.2	2.6	167.076	0	0	0	1	0.0833333	0.186741	0	0
81	30.5	1.7	68.2906	0	0	0	0	0.0557377	0.446621	0	0
70	30.1	2.7	125.736	0	0	0	1	0.089701	0.23939	0	0
81	28.6	3	71.5478	0	0	0	2	0.104895	0.399733	0	0
66	28.2	3.6	110.11	0	0	1	0	0.12766	0.256108	0	0
61	27.7	2.8	42.12	0	0	0	1	0.101083	0.657645	0	0
77	27.5	3.4	49.14	0	0	0	2	0.123636	0.559626	0	1
70	20.4	1.6	50.6002	0	0	0	0	0.0784314	0.403161	1	0
77	32.1	12.4	21.8104	0	1	0	0	0.386293	1.47178	0	0
74	30.6	8.1	49.3932	0	0	0	2	0.264706	0.619518	0	0
67	30.3	7.8	43.68	0	0	1	0	0.257426	0.693681	0	0
80	27.1	7.4	112.324	0	0	0	0	0.273063	0.241266	0	0
73	23.9	5	61.8446	0	0	0	0	0.209205	0.386452	0	0
70	23.8	4.4	67.08	0	0	0	0	0.184874	0.3548	0	0
76	21.6	3.8	106.23	0	0	0	0	0.175926	0.203333	0	0
78	100	11.41	23.6122	1	1	1	0	0.1141	4.23511	0	0
66	80.1	6.2	87.88	1	0	0	1	0.0774032	0.91147	1	0
69	63.9	11.3	41.496	1	0	1	1	0.176839	1.53991	0	0
70	54	11.3	54.5126	1	1	1	0	0.209259	0.990596	1	1
91	53.9	16	75.1046	1	0	0	0	0.296846	0.717665	0	0
74	52.9	10.1	42.4055	1	0	1	2	0.190926	1.24748	1	0
65	72.1	14.3	105.391	0	1	1	0	0.198336	0.684119	1	0
77	61.93	1.67	100.489	0	0	1	1	0.0269659	0.616283	1	0
66	81	5.5	100.318	0	0	0	1	0.0679012	0.807429	0	0
77	77.5	10.9	73.6538	0	0	1	0	0.140645	1.05222	0	0
60	77.4	5.9	73.632	0	0	1	2	0.0762274	1.05117	1	0
65	53.74	2.54	71.2858	0	0	0	0	0.0472646	0.753867	1	0
77	96.6	8.5	62.8992	0	0	0	0	0.0879917	1.53579	1	0
68	61.5	5.5	54.2506	0	0	0	0	0.0894309	1.13363	1	0
76	76	3.8	48.3538	0	0	0	0	0.05	1.57175	1	0
76	52.3	5.2	34.8566	0	0	0	2	0.0994264	1.50043	1	1
79	1.4	0.2	61.1	1	0	1	2	0.142857	0.0229133	0	1
67	1.34	0.23	41.3182	1	0	1	2	0.171642	0.0324313	1	0
53	1.1	0.3	16.9198	1	1	0	0	0.272727	0.0650127	0	0
60	3.2	0.5	44.0939	0	0	1	1	0.15625	0.0725724	0	0
69	2	0.3	36.6912	0	0	1	1	0.15	0.054509	1	0
61	0.7	0.1	30.6387	0	1	0	0	0.142857	0.0228469	0	0
80	3.5	0.5	50.986	0	0	1	0	0.142857	0.0686463	1	0
71	2.2	0.3	27.027	0	1	0	1	0.136364	0.0814001	0	0
78	1.5	0.2	21.0366	0	0	1	1	0.133333	0.0713043	1	1
71	2.3	0.3	32.1048	0	1	0	2	0.130435	0.0716404	1	0
70	3.9	0.5	41.8912	0	0	1	0	0.128205	0.0930983	0	0
69	2.5	0.3	60.762	0	0	1	2	0.12	0.0411441	1	0
76	1.7	0.2	36.9158	0	1	0	0	0.117647	0.0460507	0	0
65	3.73	0.43	66.9708	0	0	1	2	0.115282	0.0556959	0	0
66	2.7	0.3	32.4605	0	0	1	1	0.111111	0.0831781	0	1
78	2.8	0.3	57.9197	0	0	1	0	0.107143	0.0483428	1	0
61	1.9	0.2	19.188	0	0	1	0	0.105263	0.0990202	1	0
69	1.9	0.2	30.9837	0	1	0	1	0.105263	0.0613226	1	1
66	3.2	0.3	36.4021	0	0	1	0	0.09375	0.0879071	1	0
62	2.9	0.2	35.8176	0	0	1	0	0.0689655	0.0809658	1	0
70	2.4	0.1	48.8311	0	0	1	2	0.0416667	0.049149	1	1
69	6.2	2.3	68.8979	1	0	1	0	0.370968	0.0899882	1	0
78	5.1	1.5	26.6765	1	0	1	2	0.294118	0.191179	1	0
66	9.3	0.8	134.666	0	0	0	1	0.0860215	0.0690596	1	1
69	7.1	0.9	92.7763	0	0	0	1	0.126761	0.0765281	0	0
76	8.8	1.3	89.4629	0	0	0	0	0.147727	0.0983648	0	0
74	6.1	0.9	67.392	0	0	0	0	0.147541	0.0905152	1	0
69	4.5	0.4	55.4112	0	0	0	2	0.0888889	0.081211	1	0
70	7.7	1.1	54.6218	0	0	0	0	0.142857	0.140969	1	0
75	8.7	1.9	53.508	0	1	0	0	0.218391	0.162593	0	0
67	4.4	0.6	53.377	0	0	0	1	0.136364	0.0824326	1	0
69	5.57	0.85	51.8918	0	1	0	0	0.152603	0.107339	1	0
64	6.5	0.8	51.1056	0	0	0	1	0.123077	0.127188	0	0
67	8	1.8	50.7104	0	0	0	1	0.225	0.157759	0	0
74	4.5	0.5	44.1386	0	0	0	0	0.111111	0.101951	0	1
74	8.3	1.2	43.68	0	0	0	2	0.144578	0.190018	1	1
79	7.2	1.9	41.3712	0	0	0	1	0.263889	0.174034	1	0
71	8.8	1	39.52	0	0	0	0	0.113636	0.222672	1	0
77	6	1.3	38.4384	0	0	0	0	0.216667	0.156094	0	0
81	7.2	1.5	36.608	0	0	0	1	0.208333	0.196678	1	0
59	7.3	1.4	28.2906	0	0	0	1	0.191781	0.258036	1	1
69	7.2	1.2	24.9288	0	1	0	0	0.166667	0.288823	1	0
68	9.5	3.5	21.7152	0	0	0	0	0.368421	0.437482	0	0
67	18.5	2.7	41.6707	0	0	0	0	0.145946	0.443957	0	0
71	17.9	2.4	39.3994	0	0	0	1	0.134078	0.454322	0	0
62	17.2	1.2	80.0842	0	0	0	2	0.0697674	0.214774	0	0
77	15.8	2.3	62.7869	0	0	1	1	0.14557	0.251645	0	0
79	14.6	2	68.5786	0	0	0	1	0.136986	0.212894	1	0
70	12.7	1.3	52.285	0	0	0	0	0.102362	0.2429	1	0
68	12.1	1.2	36.3418	0	0	0	1	0.0991736	0.33295	1	0
65	11.9	1.2	42.3259	0	1	0	2	0.10084	0.281152	1	0
67	11.7	1.4	42.7211	0	0	0	0	0.119658	0.273869	1	1
64	11.1	1.2	56.8838	0	1	0	1	0.108108	0.195135	0	1
71	11	1.3	68.7898	0	0	0	1	0.118182	0.159908	1	0
73	10.2	1.4	36.9408	0	0	1	0	0.137255	0.276117	1	0
65	10	1.1	29.12	0	0	0	0	0.11	0.343407	1	0
87	18.32	2.28	38.2684	1	0	1	1	0.124454	0.478724	1	1
57	16.1	2.01	59.904	1	0	1	2	0.124845	0.268763	0	0
73	16.1	8.3	45.6674	1	1	1	1	0.515528	0.352549	1	0
72	15.9	1.8	76.128	1	0	1	0	0.113208	0.208859	1	1
63	14.7	1.2	25.247	1	1	1	2	0.0816327	0.582246	1	0
70	13.6	1.7	46.0938	1	1	1	1	0.125	0.29505	0	0
74	10.9	6.1	15.7248	1	0	1	1	0.559633	0.693173	0	0
69	10.5	1	29.1997	1	0	0	0	0.0952381	0.359593	1	1
64	48.7	10.9	51.0796	1	1	1	1	0.223819	0.953414	1	0
78	47.4	7.4	88.9746	1	1	1	2	0.156118	0.532736	1	0
73	47.1	11.3	92.326	1	1	1	1	0.239915	0.510149	1	0
82	46.2	3.3	14.976	1	0	1	2	0.0714286	3.08494	1	0
81	38.6	4.3	26.4742	1	0	1	1	0.111399	1.45802	1	0
77	30.5	6.1	68.3155	1	0	1	0	0.2	0.446458	0	0
80	28.9	3.6	143.919	1	0	1	2	0.124567	0.200807	1	0
86	27	4.6	50.4473	1	0	0	0	0.17037	0.535212	0	0
71	24.1	3.5	61.776	1	1	1	0	0.145228	0.390119	0	0
79	23	2.3	27.2568	1	0	0	2	0.1	0.843825	1	1
69	21.6	2.5	28.665	1	0	1	2	0.115741	0.753532	1	0
79	20.8	10.1	66.0442	1	0	0	0	0.485577	0.314941	1	0
84	20.1	4.2	11.232	1	1	0	1	0.208955	1.78953	1	0
62	39.4	5.9	60.5405	0	0	0	0	0.149746	0.650804	0	0
75	38	3.5	35.49	0	0	1	1	0.0921053	1.07072	1	0
70	30.6	4.1	64.9334	0	0	0	0	0.133987	0.471252	0	0
69	29.1	3.7	39.1076	0	0	0	1	0.127148	0.7441	1	1
82	28.7	3.68	75.479	0	0	0	0	0.128223	0.380238	0	0
69	27.1	4.1	86.8868	0	0	0	1	0.151292	0.3119	0	0
81	24.1	1.7	41.0467	0	0	1	1	0.0705394	0.587136	1	1
75	22.27	0.98	30.5885	0	0	0	0	0.0440054	0.728052	1	0
51	21	2	79.4976	0	0	0	1	0.0952381	0.264159	1	1
63	46.1	9.5	72.1344	0	0	0	1	0.206074	0.639085	1	0
62	42.8	8.6	80.2516	0	0	0	1	0.200935	0.533323	0	0
77	42.1	7	61.5097	0	0	0	1	0.166271	0.684445	1	0
68	39.2	10.2	94.433	0	1	0	0	0.260204	0.415109	1	0
50	31.5	6.2	138.933	0	0	0	1	0.196825	0.226729	0	0
78	29.3	5.1	130.224	0	0	0	2	0.174061	0.224996	0	0
78	24.9	6.5	27.5558	0	0	0	1	0.261044	0.90362	1	0
81	23.26	9.41	41.7924	0	1	0	0	0.404557	0.556561	1	0
74	21.7	3.5	37.908	0	0	1	1	0.16129	0.572439	1	0
76	100	42.3	33.0221	1	1	1	0	0.423	3.02828	0	0
50	88.4	17.6	131.926	1	1	1	0	0.199095	0.670072	1	0
67	73.9	8.3	80.8704	1	1	1	1	0.112314	0.913808	1	0
65	70.6	8.8	94.9104	1	1	1	0	0.124646	0.743859	0	0
74	70.6	13.5	92.352	1	0	0	0	0.191218	0.764466	0	0
72	64	8.6	50.2424	1	0	1	0	0.134375	1.27382	1	0
73	62.29	31.66	24.0677	1	0	1	0	0.508268	2.58812	1	0
78	57	17.1	95.8464	1	1	0	1	0.3	0.594702	1	0
52	54.1	12.3	117.745	1	0	1	1	0.227357	0.459469	0	0
88	51.6	6.98	55.0264	1	0	0	0	0.135271	0.937732	0	0
72	64	8.6	99.8794	0	0	1	0	0.134375	0.640773	1	0
81	80.1	10.6	52.2413	0	0	0	0	0.132335	1.53327	0	1
73	63.9	5.2	41.496	0	0	1	0	0.0813772	1.53991	0	0
80	2.7	0.5	37.9922	1	1	0	0	0.185185	0.0710671	0	0
90	2.5	0.6	51.4767	1	0	1	0	0.24	0.0485657	1	0
69	2.3	0.8	29.8116	1	1	0	1	0.347826	0.0771512	1	0
60	0.6	0.1	39.52	1	1	0	1	0.166667	0.0151822	1	0
68	1.3	0.2	40.0171	0	0	1	0	0.153846	0.0324861	1	0
68	2.5	0.3	51.324	0	1	0	1	0.12	0.0487102	1	0
68	3.4	0.4	55.4299	0	0	1	1	0.117647	0.0613387	0	0
77	0.9	0.1	38.376	0	1	0	1	0.111111	0.0234522	1	0
64	0.9	0.1	18.6732	0	0	1	1	0.111111	0.0481974	0	0
61	1.9	0.2	68.4112	0	0	1	1	0.105263	0.0277732	1	0
76	1	0.1	60.88	0	0	1	1	0.1	0.0164257	1	0
70	3.1	0.3	20.9664	0	0	1	0	0.0967742	0.147856	1	0
60	2	0.1	32.76	0	1	0	1	0.05	0.0610501	0	0
74	6.8	2.5	58.6872	1	0	0	1	0.367647	0.115869	0	1
61	4.4	0.5	64.6121	1	0	0	1	0.113636	0.0680987	0	0
70	5.9	0.9	98.4256	0	0	0	0	0.152542	0.0599438	0	0
83	5.5	0.5	51.0796	0	0	0	0	0.0909091	0.107675	0	0
72	7	0.9	50.6189	0	0	0	2	0.128571	0.138288	1	0
84	8	1.8	45.6144	0	0	0	0	0.225	0.175383	1	0
69	7.8	1.2	44.616	0	1	0	1	0.153846	0.174825	0	0
74	6.9	1	41.2984	0	1	0	0	0.144928	0.167077	0	0
67	7.3	1.4	41.1382	0	0	0	1	0.191781	0.17745	0	0
70	8.9	1.2	36.7676	0	0	0	1	0.134831	0.242061	1	0
67	8	1.4	34.3699	0	0	0	2	0.175	0.232762	1	0
63	6	1.2	28.5714	0	0	0	1	0.2	0.21	1	1
70	19.5	2.4	41.3213	0	0	0	0	0.123077	0.471912	1	1
67	19.1	3	64.4904	0	0	0	1	0.157068	0.296168	1	1
70	13.5	1.4	74.281	0	0	0	0	0.103704	0.181742	0	1
85	13.2	1.3	65.1794	1	0	0	1	0.0984848	0.202518	0	1
79	44.2	6.2	74.66	1	1	0	0	0.140271	0.592017	1	1
87	20.28	6.3	22.5716	1	0	0	1	0.310651	0.898473	0	1
67	39.2	3.7	138.88	0	0	0	0	0.0943878	0.282257	1	1
61	35.5	3.7	72.3341	0	0	0	1	0.104225	0.490778	0	1
71	24.9	3.2	88.041	0	0	0	2	0.128514	0.282823	1	1
51	21.9	0.9	27.8554	0	0	0	0	0.0410959	0.786204	0	1
66	20.8	1.6	45.2525	0	1	1	0	0.0769231	0.459643	0	1
75	20.5	3	49.92	0	1	0	0	0.146341	0.410657	1	0
78	20.3	1.8	35.2061	0	0	0	0	0.08867	0.576605	1	0
73	30.8	14.8	94.589	0	0	0	1	0.480519	0.325619	0	1
79	20.7	9.4	49.036	0	0	0	0	0.454106	0.422139	0	0
71	73.4	9.4	29.2032	1	0	1	1	0.128065	2.51342	0	0
71	70.1	10.6	100.082	1	0	1	1	0.151213	0.700427	0	0
